## CORRECTION

# Correction: Microtubule-induced nuclear envelope fluctuations control chromatin dynamics in *Drosophila* embryos

**Bernhard Hampoelz, Yannick Azou-Gros, Roxane Fabre, Olga Markova, Pierre-Henri Puech and Thomas Lecuit**

There was an error published in *Development* **138**, 3377-3386.

The incorrect affiliation was listed for Pierre-Henri Puech. The correct affiliation is INSERM UMR 600/CNRS UMR 6212, Case 937-163, Avenue de Luminy, 13288 Marseille Cedex 09, France.

The authors apologise to readers for this mistake.
